# Supplementary material
Source: Royal Society of Chemistry journal article supplement (doi:10.1039/d6ta02252a)
Supplement: d6ta02252a1.pdf [file d6ta02252a1.pdf]

Supporting Information for

**Low-Cost and Sustainable Hard Carbon Derived from the  
Peony Shell for the Stable Sodium-Ion Anode**

Haopo Li, Fang Wang,\* Zhangqin Shi, Fangya Guo, Ting Feng, Huimin Han, Nuoyan Wang, Shuaisong Wang, Yuting Yang, Haitao Wu, Yi Xiong, Fengzhang Ren,\* Xinyang Yue\*

\*Corresponding authors:

wangfang1116@163.com (F.W.)

renfz@haust.edu.cn (F.R.)

xinyangyue@sjtu.edu.cn (X.Y.)

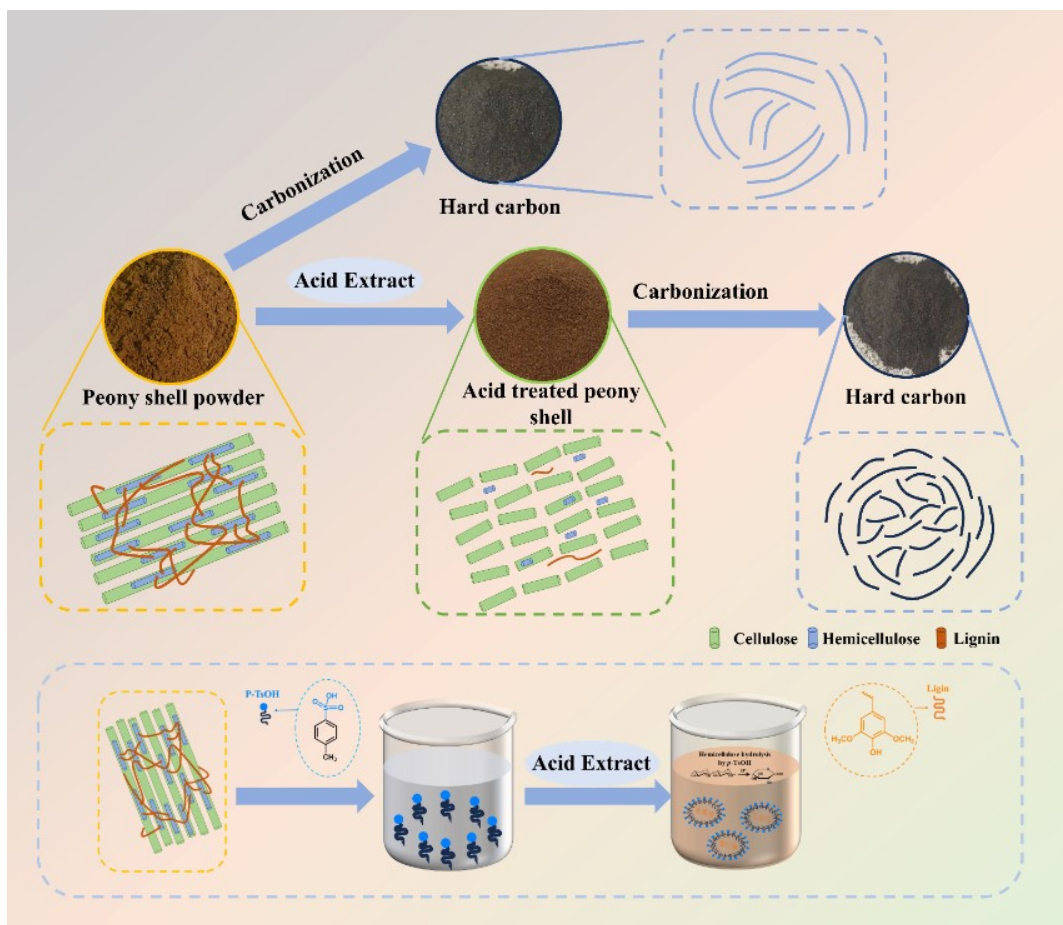

**Fig. S1.** Schematic of the preparation process for HC materials.

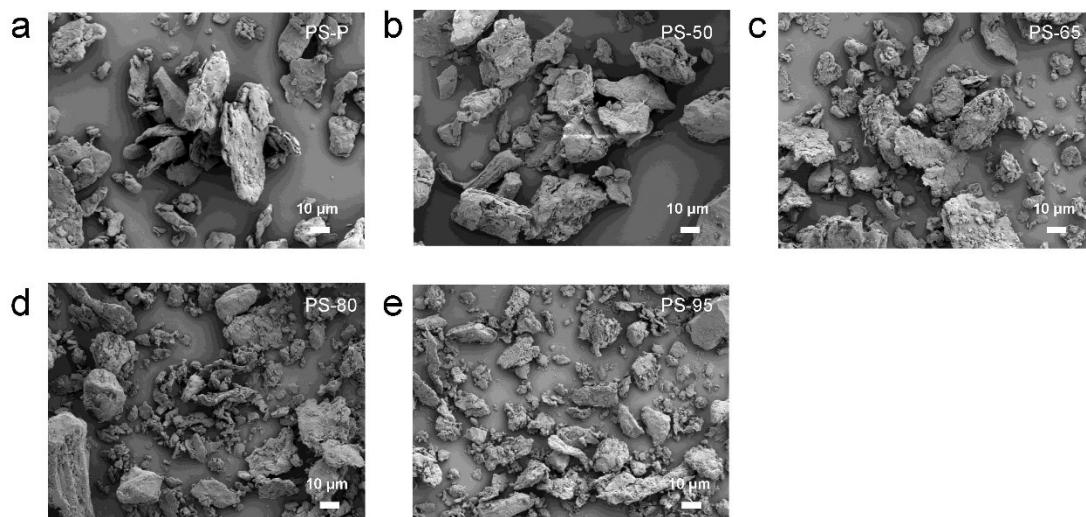

**Fig. S2.** SEM images of (a) PS-P, (b) PS-50, (c) PS-65, (d) PS-80, and (e) PS-95.

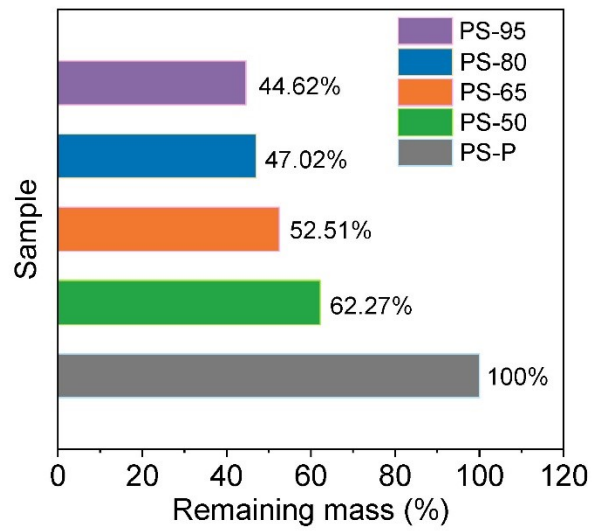

**Fig. S3.** Quality residual diagram after acid treatment.

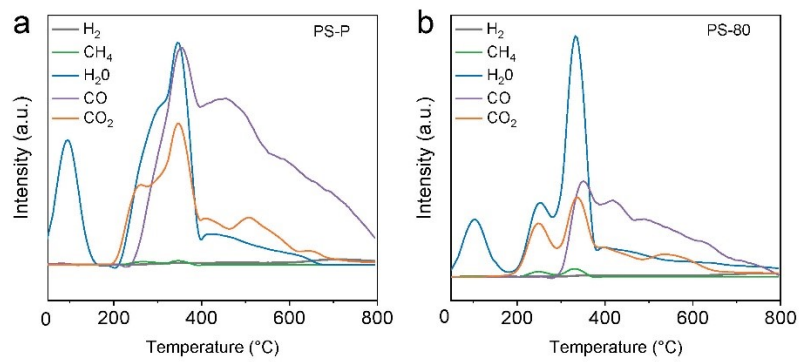

**Fig. S4.** MS results of (a) PHC-T0 and (b) PHC-T80.

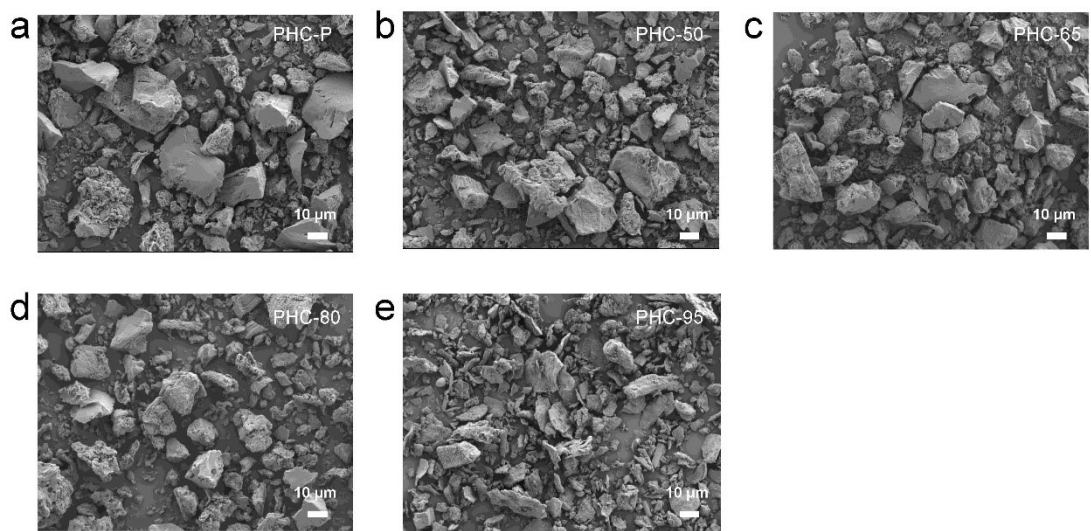

**Fig. S5.** SEM images of (a) PHC-P, (b) PHC-50, (c) PHC-65, (d) PHC-80, and (e) PHC-95.

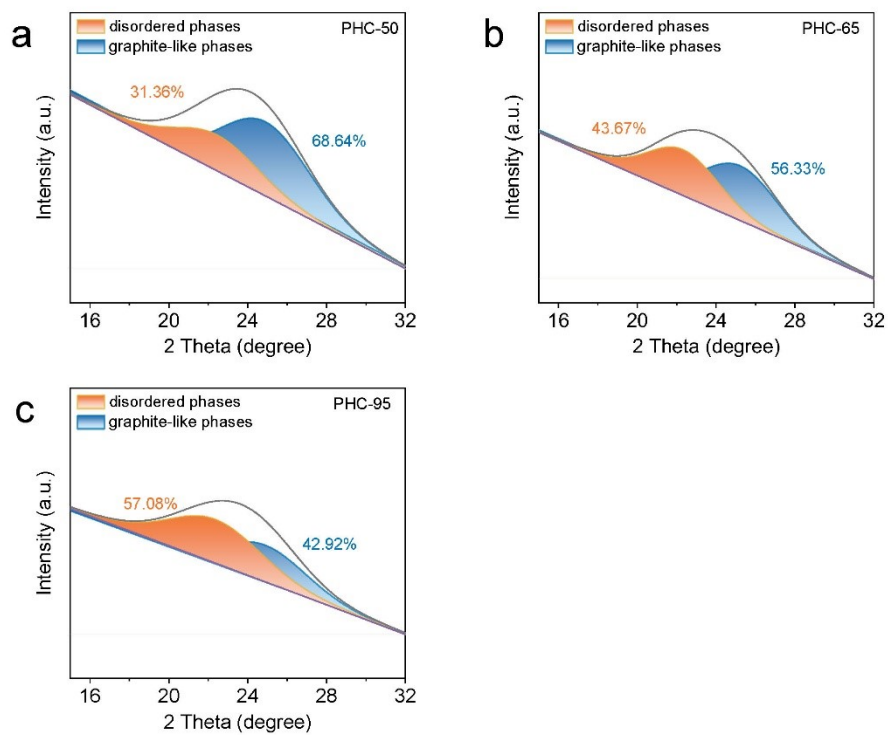

**Fig. S6.** XRD patterns and fitted curves of (a) PHC-50, (b) PHC-65, and (c) PHC-95.

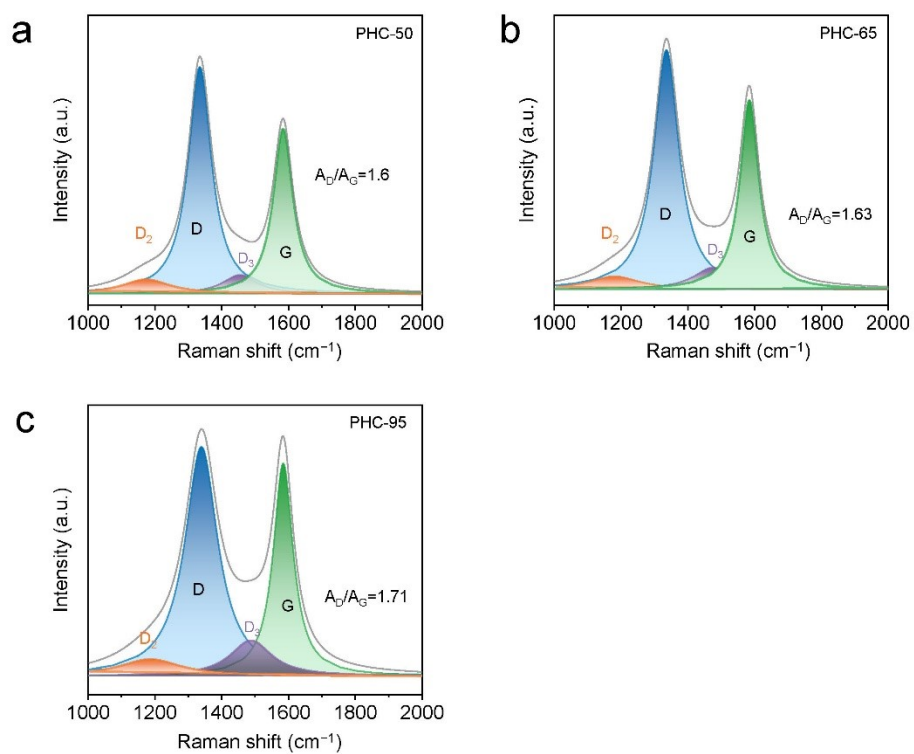

**Fig. S7.** Raman patterns and fitted curves of (a) PHC-50, (b) PHC-65, and (c) PHC-95.

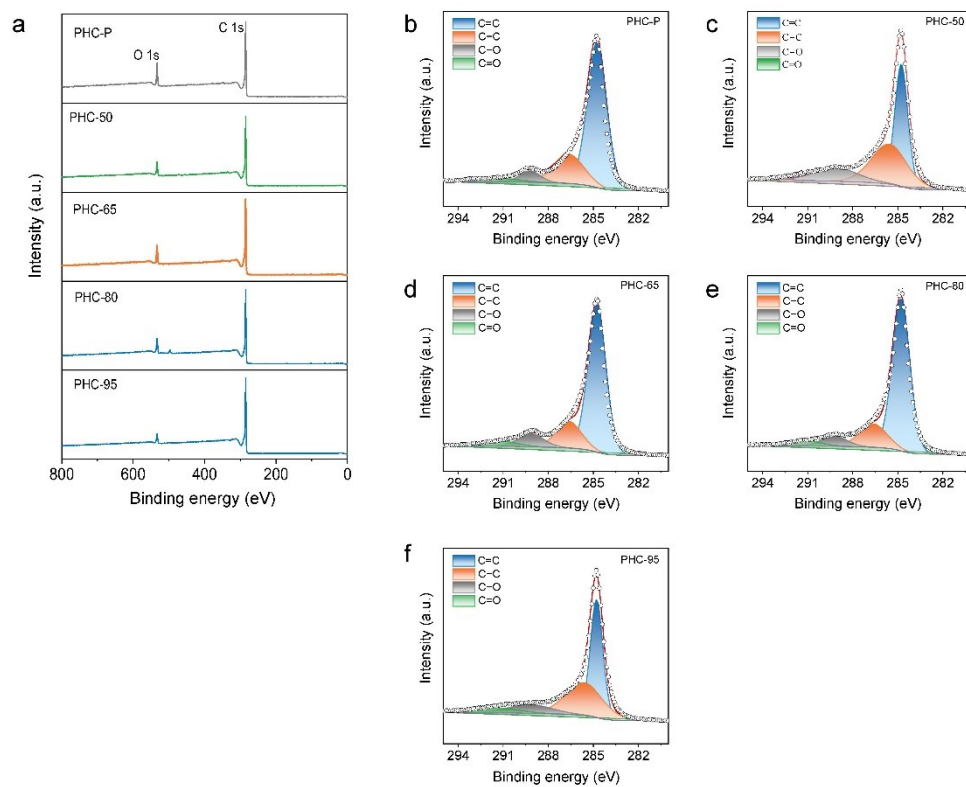

**Fig. S8.** (a) XPS pattern of samples. XPS C 1s spectra of (b) PHC-P, (c) PHC-50, (d) PHC-65, (e) PHC-80, and (f) PHC-95.

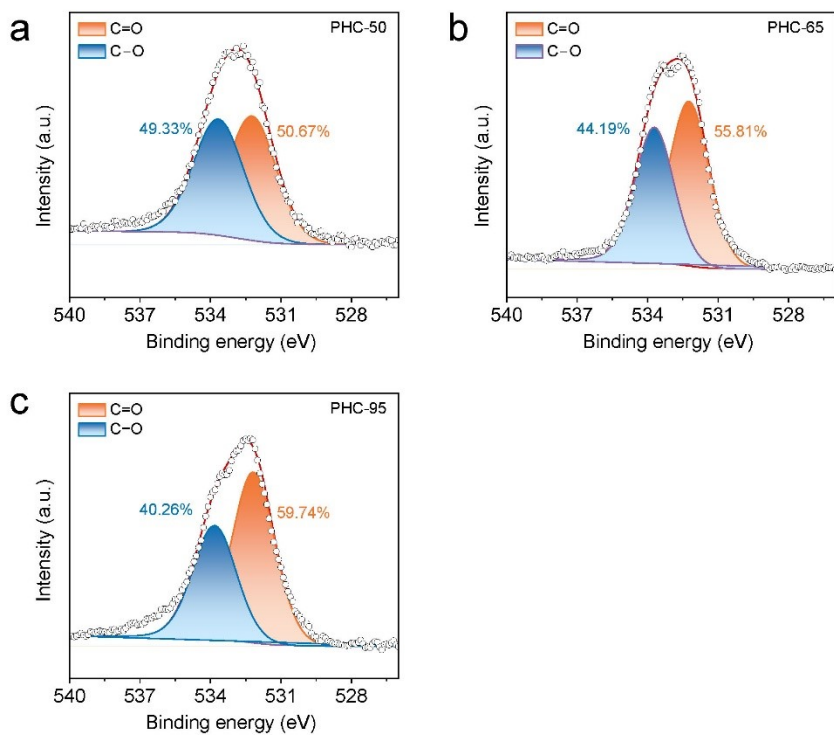

**Fig. S9.** XPS patterns and fitted curves of (a) PHC-50, (b) PHC-65, and (c) PHC-95.

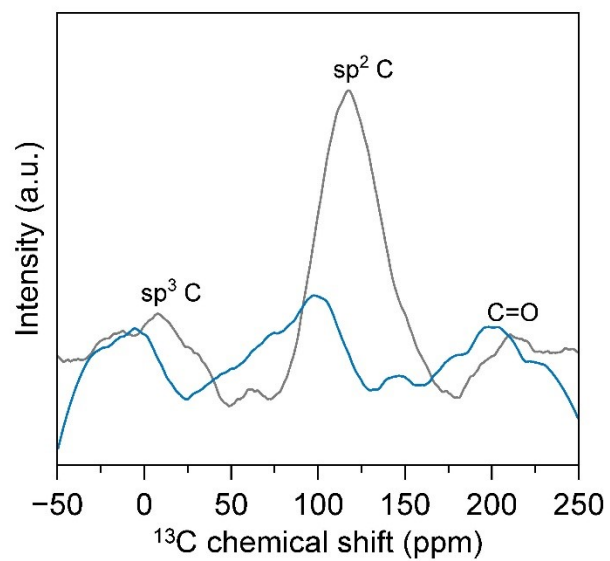

**Fig. S10.**  $^{13}\text{C}$  NMR spectra of PHC-P and PHC-80.

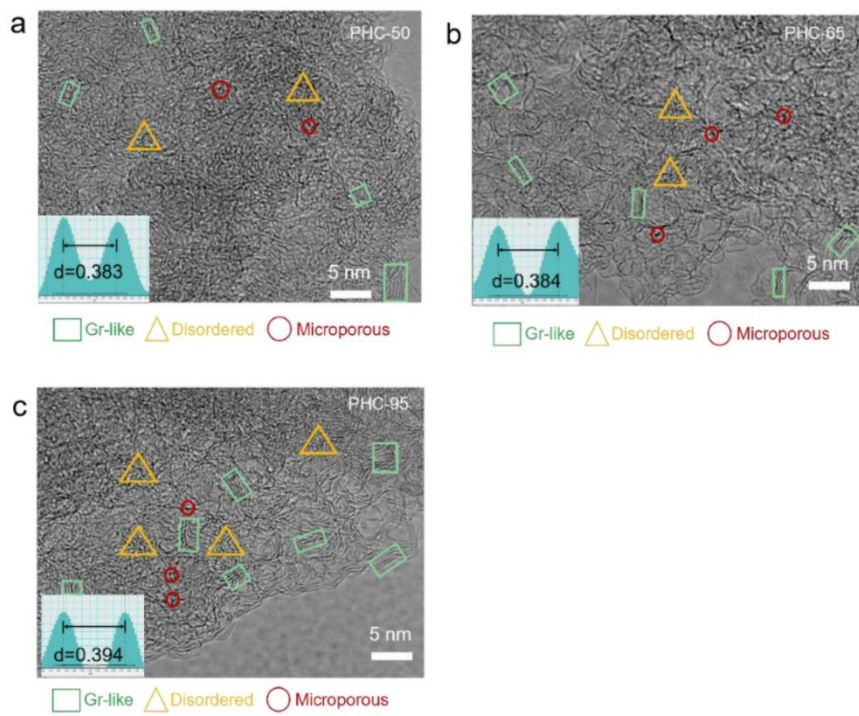

**Fig. S11.** TEM images of (a) PHC-50, (b) PHC-65, and (c) PHC-95.

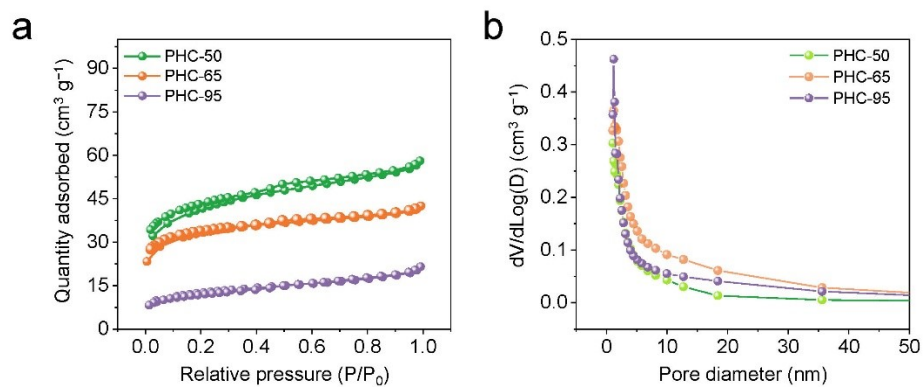

**Fig. S12.** (a) N<sub>2</sub> adsorption-desorption isotherms and (b) pore size distribution of N<sub>2</sub> adsorption-desorption isotherms of PHC-50, PHC-65, and PHC-95.

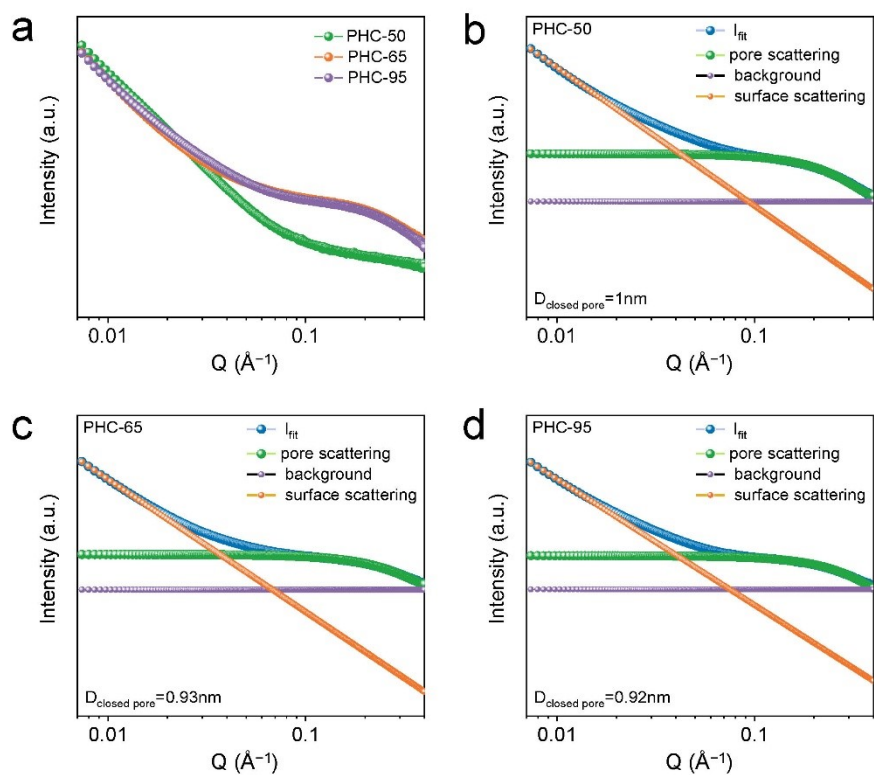

**Fig. S13.** (a) SAXS curves of PHC-50, PHC-65, and PHC-95. The fitted SAXS spectra of (b) PHC-50, (c) PHC-65, and (d) PHC-95.

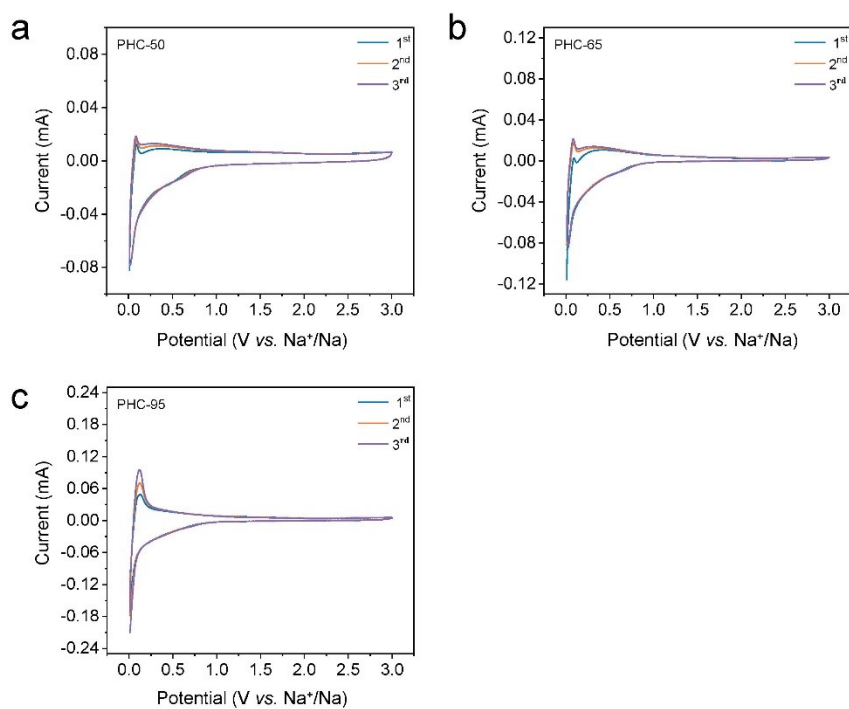

**Fig. S14.** CV curves for (a) PHC-50, (b) PHC-65, and (c) PHC-95 under  $0.1\text{mV s}^{-1}$ .

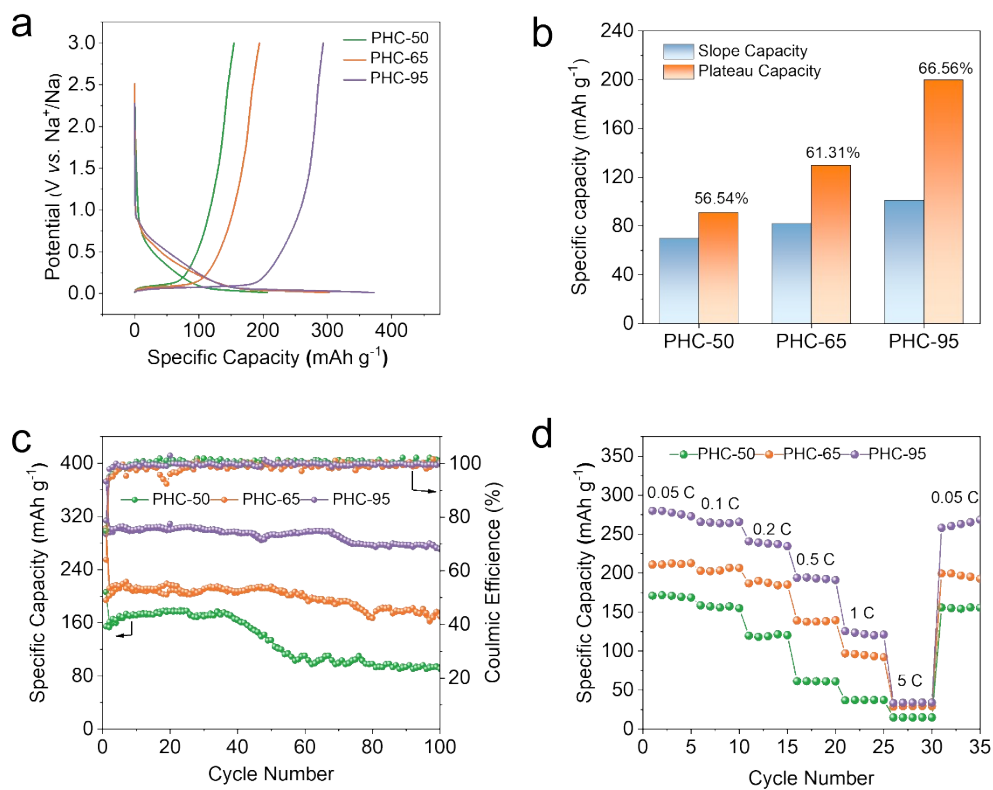

**Fig. S15.** (a) The initial charge/discharge curves of the half cell using PHC-50, PHC-65, and PHC-95. (b) The percentage of plateau capacity and slope capacity of the second discharging curve for PHC-50, PHC-65, and PHC-95 cells. (c) The long cycle performance and (d) rate capability of the half cell using PHC-50, PHC-65, and PHC-95.

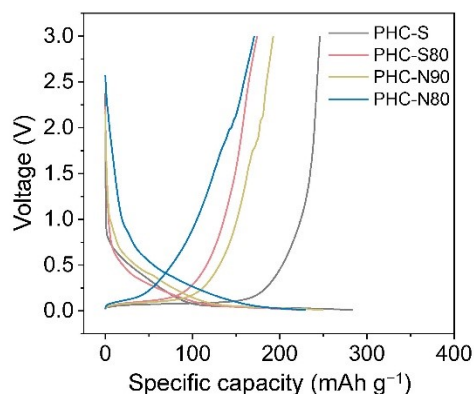

**Fig. S16.** Initial galvanostatic discharge/charge profiles of PHC-S, PHC-S80, PHC-N90, and PHC-N80 at 0.1 C. Two conditions were applied for sulfuric acid treatment. In the first, peony shell powder was mixed with 1 M H<sub>2</sub>SO<sub>4</sub> at a solid-to-liquid ratio of 1:10 and stirred at room temperature for 6 h, then washed with distilled water until the pH reached 7, and dried at 80 °C for 12 h. This sample was designated PS-S. In the other group, the mixture was stirred in a water bath at 80 °C for 20 min, then washed to neutrality and dried, designated PS-S80. Two conditions were also used for alkali treatment. The 5 wt% NaOH solution was prepared, and peony shell powder was added at a ratio of 1:10. One batch was treated in a 90 °C water bath for 2 h, washed thoroughly with water until neutral, and dried at 80 °C for 12 h (designated PS-N90). The other group was treated at 80 °C for 20 min and then dried at 80 °C for 12 h (designated PS-N80). The carbonization process remains consistent with the previous one.

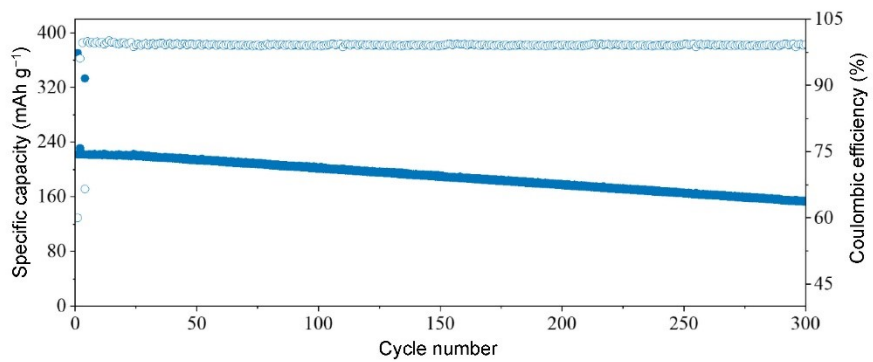

**Fig. S17.** Cycling performance of the half cell using PHC-80 at 1 C.

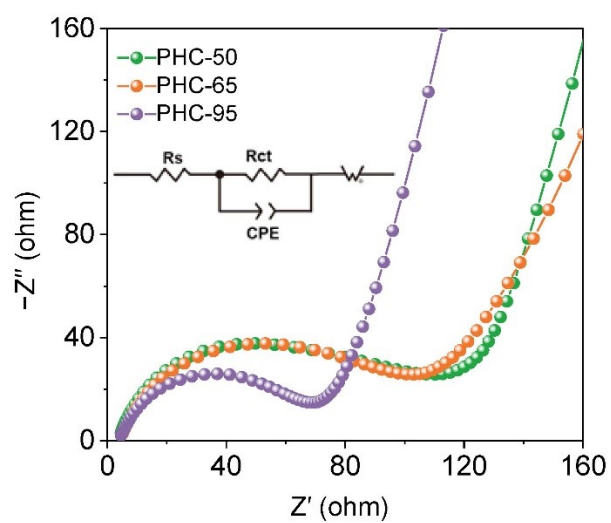

**Fig. S18.** The electrochemical impedance spectroscopy (EIS) curves of the half cell using PHC-50, PHC-65, and PHC-95.

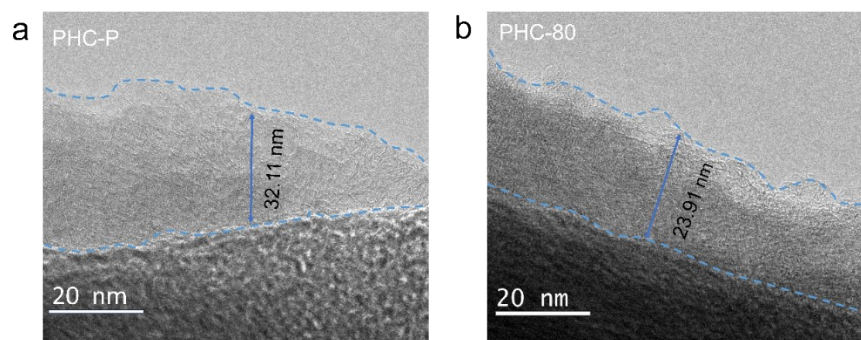

**Fig. S19.** HRTEM images of the SEI from (a) PHC-P and (b) PHC-80 anodes.

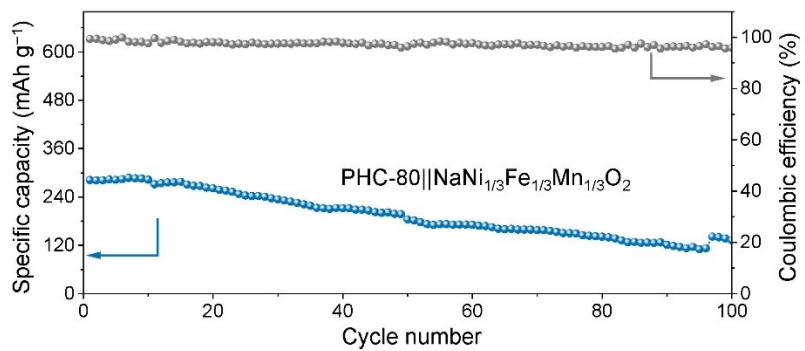

**Fig. S20.** Cycling performance of the full cell using PHC-80.

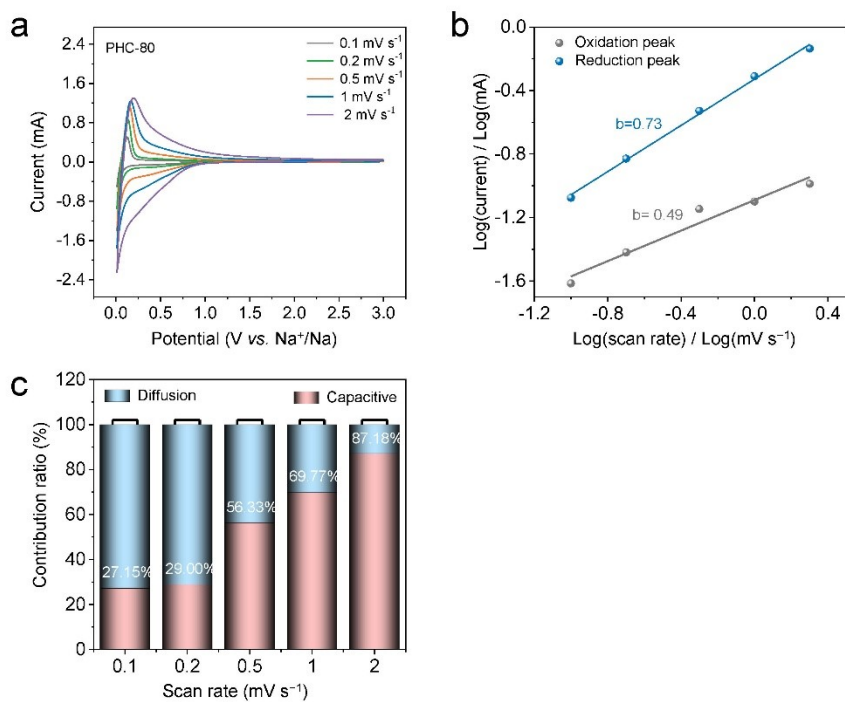

**Fig. S21.** (a) CV curves under different scan rates from  $0.1 \text{ mV s}^{-1}$  to  $2 \text{ mV s}^{-1}$ . (b) The relationship between  $\lg(v)$  and  $\lg(i)$ . (c) The capacitive capacity contribution at different scan rates for PHC-80.

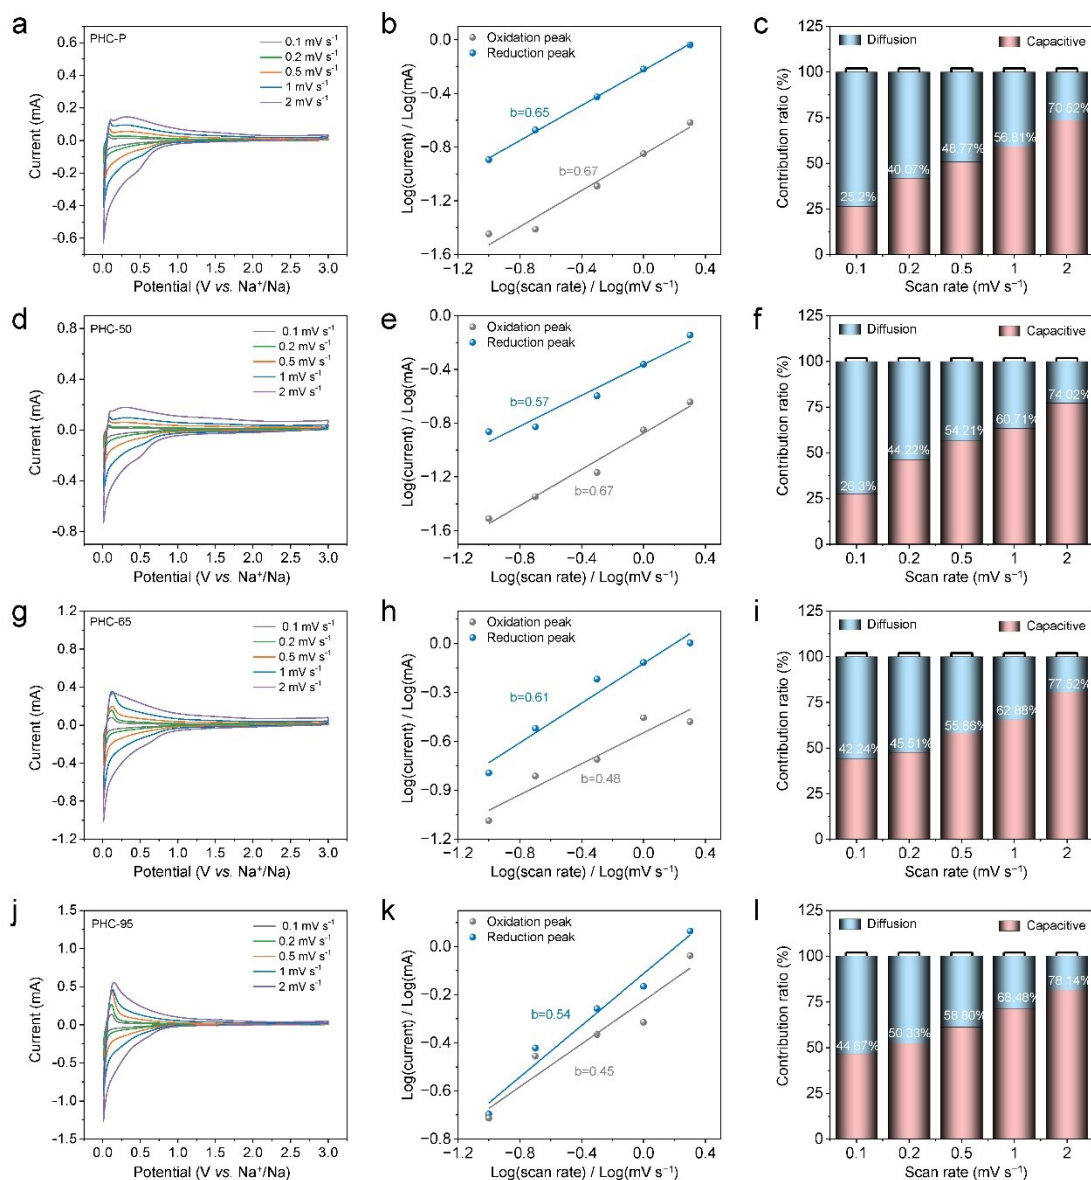

**Fig. S22.** CV curves and capacitive capacity contribution under different scan rates from  $0.1 \text{ mV s}^{-1}$  to  $2 \text{ mV s}^{-1}$  for (a–c) PHC-P, (d–f) PHC-50, (g–i) PHC-65, and (j–l) PHC-95.

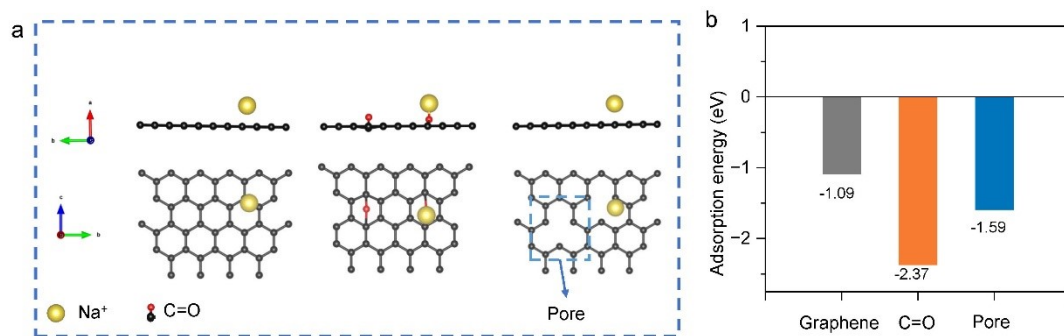

**Fig. S23.** (a) Schematic of  $\text{Na}^+$  adsorption sites (monolayer). (b) Adsorption energy.

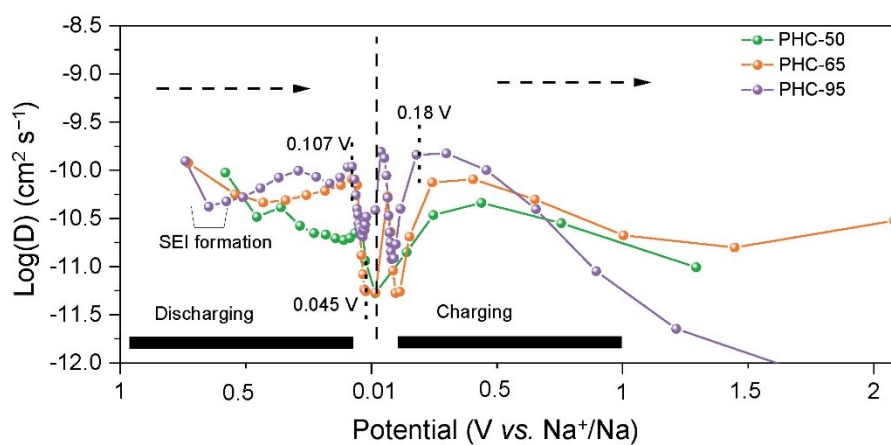

**Fig. S24.** Calculated  $\text{Na}^+$  diffusion coefficients during discharge and charge of PHC-50, PHC-65, and PHC-95.

**Table S1.** Component analysis (wt.%) of almond shell.

| Sample | cellulose | hemicellulose | lignin | ashes |
|--------|-----------|---------------|--------|-------|
| PS     | 29.28     | 22.87         | 43.93  | 3.9   |
| PS-50  | 35.69     | 18.01         | 42.82  | 3.5   |
| PS-65  | 40.77     | 15.08         | 41.25  | 2.9   |
| PS-80  | 46.75     | 12.44         | 38.60  | 2.2   |
| PS-95  | 50.62     | 10.24         | 37.34  | 1.8   |

**Table S2.** Molecular weight of almond shell.

| Sample | $M_w$  | $M_n$ | $M_w/M_n$ |
|--------|--------|-------|-----------|
| PS     | 185147 | 39731 | 4.66001   |
| PS-50  | 147719 | 40760 | 3.62412   |
| PS-65  | 123739 | 40760 | 4.06822   |
| PS-80  | 118692 | 29944 | 3.96383   |
| PS-95  | 102582 | 33515 | 3.06078   |

**Table S3.** Analysis parameters of the HCS from XRD and Raman spectroscopy.

|        | (002) peak |             |              |              | Disordered region |             |       | Graphite-like region |             |       | $A_D/A_G$ |
|--------|------------|-------------|--------------|--------------|-------------------|-------------|-------|----------------------|-------------|-------|-----------|
|        | $2\theta$  | $d_{(002)}$ | $L_{c(002)}$ | $L_{a(002)}$ | $2\theta$         | $d_{(002)}$ | Area  | $2\theta$            | $d_{(002)}$ | Area  |           |
|        | (°)        |             | nm           |              | (°)               | nm          | (%)   | (°)                  | nm          | (%)   |           |
| PHC-P  | 23.797     | 0.373       | 1.99         | 4.07         | 22.067            | 0.403       | 29.29 | 24.6024              | 0.362       | 70.71 | 1.5       |
| PHC-50 | 23.298     | 0.381       | 1.17         | 2.40         | 21.941            | 0.405       | 37.92 | 24.8255              | 0.359       | 62.08 | 1.6       |
| PHC-65 | 23.065     | 0.385       | 1.20         | 2.44         | 21.802            | 0.407       | 45.42 | 24.5957              | 0.362       | 54.58 | 1.63      |
| PHC-80 | 22.434     | 0.396       | 1.10         | 2.24         | 21.747            | 0.408       | 59.78 | 24.5054              | 0.363       | 40.22 | 2.1       |
| PHC-95 | 22.700     | 0.392       | 1.20         | 2.44         | 21.887            | 0.406       | 51.87 | 24.6779              | 0.361       | 48.13 | 1.71      |

**Table S4.** The element contents of C and O in all samples.

| Sample | Atomic % |       | Functional group % |       |
|--------|----------|-------|--------------------|-------|
|        | C        | O     | C=O                | C–O   |
| PHC-P  | 87.88    | 12.12 | 51.95              | 48.05 |
| PHC-50 | 89.06    | 10.94 | 49.33              | 50.67 |
| PHC-65 | 89.79    | 10.21 | 44.19              | 55.81 |
| PHC-80 | 90.14    | 9.86  | 36.32              | 63.68 |
| PHC-95 | 93.76    | 6.24  | 40.26              | 59.74 |

**Table S5.** Pore structure analyzed from N<sub>2</sub> adsorption-desorption and SAXS results

| Sample | N <sub>2</sub> adsorption-desorption |                   |                    | CO <sub>2</sub> adsorption-desorption |                    | SAXS                     |                          |
|--------|--------------------------------------|-------------------|--------------------|---------------------------------------|--------------------|--------------------------|--------------------------|
|        | $S_{\text{BET}}$                     | $D_{\text{pore}}$ | $V_{\text{pore}}$  | $S_{\text{DFT}}$                      | $V_{\text{pore}}$  | $D_{\text{closed pore}}$ | $V_{\text{closed pore}}$ |
|        | m <sup>2</sup> g <sup>-1</sup>       | (nm)              | g cm <sup>-3</sup> | m <sup>2</sup> g <sup>-1</sup>        | g cm <sup>-3</sup> | (nm)                     | g cm <sup>-3</sup>       |
| PHC-0  | 145.62                               | 2.5491            | 0.0928             | 30.7                                  | 0.01482            | 1.06                     | 0.112                    |
| PHC-50 | 138.15                               | 2.6008            | 0.0898             |                                       |                    | 1.00                     |                          |
| PHC-65 | 104.12                               | 2.5163            | 0.0655             |                                       |                    | 0.93                     |                          |
| PHC-80 | 7.1424                               | 3.6068            | 0.0064             | 43.865                                | 0.01895            | 0.88                     | 0.545                    |
| PHC-95 | 41.4                                 | 3.1936            | 0.0331             |                                       |                    | 0.93                     |                          |

**Table S6.** The ICE and capacity of HCS measured at a current density of 0.0279 A g<sup>-1</sup>.

| Sample | Reversible capacity (mAh g <sup>-1</sup> ) | ICE (%) | 2 <sup>th</sup> Discharge capacity (mAh g <sup>-1</sup> ) | Plateau capacity for 1 <sup>st</sup> cycle (mAh g <sup>-1</sup> ) | Capacity retention rate after 100 cycles (%) |
|--------|--------------------------------------------|---------|-----------------------------------------------------------|-------------------------------------------------------------------|----------------------------------------------|
| PHC-P  | 144.4                                      | 68.69   | 175.79                                                    | 67                                                                | 53.88                                        |
| PHC-50 | 154                                        | 74.94   | 161.01                                                    | 91                                                                | 59.34                                        |
| PHC-65 | 194                                        | 64.14   | 212                                                       | 130                                                               | 87.87                                        |
| PHC-80 | 333                                        | 79.98   | 333.17                                                    | 180                                                               | 90.63                                        |
| PHC-95 | 293                                        | 78.72   | 301.85                                                    | 200                                                               | 85.66                                        |

**Table S7.** The Na storage properties of various natural biomasses derived hard carbon.

| Sources                | Specific capacity<br>(mAh g <sup>-1</sup> ) | ICE (%) | Retention (%) / Cycle (n) /<br>rate (mA g <sup>-1</sup> ) | Ref.      |
|------------------------|---------------------------------------------|---------|-----------------------------------------------------------|-----------|
| Cellulose              | 335                                         | 89      | 97/200/100                                                | [1]       |
| Oak leaves<br>biowaste | 378                                         | 84.7    | 97/100/30                                                 | [2]       |
| Bamboo                 | 320                                         | 91.4    | 91/300/100                                                | [3]       |
| Asphalt                | 318.3                                       | 86.14   | 90/200/292                                                | [4]       |
| Brown coal             | 316.3                                       | 87.6    | 95/300/100                                                | [5]       |
| Tea                    | 308                                         | 90      | 91/500/280                                                | [6]       |
| Rosewood lignin        | 326                                         | 71      | 85/800/500                                                | [7]       |
| Lignin                 | 302                                         | 85      | 87/500/300                                                | [8]       |
| Peony shell            | 333                                         | 80      | 90/100/300                                                | This work |

## References

- [1] Y. Mao, Z. Yi, L. Xie, et al. *Energy Storage Mater.*, 2024, 73, 103845.
- [2] M. Ishaq, M. Jabeen, Y.S. He, et al. *Adv. Energy Mater.*, 2025, 15, 2403142.
- [3] C. Wu, Y. Yang, Y. Zhang, et al. Chou, *Angew. Chem. Int. Ed.*, 2024, 63, e202406889.
- [4] L.B. Wang, Z.K. Xu, P. Lin, et al. *Adv. Energy Mater.*, 2025, 15, 2403084.
- [5] K. Liu, Y. Guo, B. Liu, et al. *Chin. Chem. Lett.*, 2025, 111156.
- [6] Q. He, H. Chen, X. Chen, et al. *Adv. Funct. Mater.*, 2024, 34, 2310226.
- [7] S. Zhou, Z. Tang, Z. Pan, et al. *SusMat*, 2022, 2, 357.
- [8] Z. Tang, D. Jiang, Z. Fu, et al. *Small Methods*, 2024, 8, 2400509.
